# Supplementary material
Source: MDPI journal article supplement (https://www.mdpi.com/2073-4395/13/1/64)
Supplement: s1 [file s1]

-----SUPPLEMENTAL MATERIAL-----

**Early and Late Season Nutrient Stress Conditions: Impact on Cotton**

**Productivity and Quality**

**Solomon Amissah <sup>1</sup>, Michael Baidoo <sup>2</sup>, Benjamin K. Agyei <sup>1,3</sup>, Godfred Ankomah <sup>1</sup>, Roger A. Black <sup>4</sup>, Calvin D. Perry <sup>5</sup>, Stephanie Hollifield <sup>6</sup>, Nana Yaw Kusi <sup>7</sup>, Glendon H. Harris <sup>1</sup> and Henry Y. Sintim <sup>1,\*</sup>**

<sup>1</sup> Department of Crop & Soil Sciences, University of Georgia, Tifton, GA 31793, USA

<sup>2</sup> Vision Research Park, United Agronomy, Berthold, ND 58718, USA

<sup>3</sup> Department of Plant, Soil, and Microbial Sciences, Michigan State University, East Lansing, MI 48824, USA

<sup>4</sup> Southeast Georgia Research and Education Center, University of Georgia, Midville, GA 30441, USA

<sup>5</sup> The C. M. Stripling Irrigation Research Park, University of Georgia, Camilla, GA 31730, USA

<sup>6</sup> Southwest District Extension, University of Georgia, Tifton, GA 31794, USA

<sup>7</sup> Research and Extension, South Carolina State University, Orangeburg, SC 29117, USA

\* Correspondence: [hsintim@uga.edu](mailto:hsintim@uga.edu)

Table S1: Fertilizers applied as the main sources of the different nutrient elements in Camilla and Midville.

| Nutrient | Camilla SSDI                                                | Camilla overhead and Midville rainfed and overhead |
|----------|-------------------------------------------------------------|----------------------------------------------------|
| N        | Urea                                                        | Urea                                               |
| P        | Di-ammonium phosphate; Haifa MAP™                           | Di-ammonium phosphate                              |
| K        | Potassium chloride; Potassium nitrate                       | Potassium chloride                                 |
| Mg       | Magnesium oxy-sulfate; Magnesium nitrate solution           | Magnesium oxy-sulfate                              |
| Ca       | Calcium chloride; Calcium sulfate; Calcium nitrate solution | Calcium chloride; Calcium sulfate                  |
| S        | Potassium sulfate; Epsom; Ammonium thiosulfate solution     | Potassium sulfate; Epsom                           |
| B        | Fertilizer borate; Borosol® 10 solution                     | Fertilizer borate                                  |
| Zn       | Zinc oxysulfate; Zinc nitrate solution                      | Zinc oxysulfate                                    |
| Mn       | Manganese sucate; Manganese nitrate solution                | Manganese sucate                                   |
| Fe       | Iron sucate; Iron nitrate solution                          | Iron sucate                                        |
| Cu       | Copper sulfate; Copper nitrate solution                     | Copper sulfate                                     |

Table S2: *P*-values of the main effects and interaction effects of nutrient stress and production conditions on the growth and productivity of cotton in Camilla and Midville.

| Source               | Lint yield       | Gin turnout      | Cottonseed yield | Seed cotton per boll | Plant height | Main stem nodes | Total bolls  | Harvestable bolls |
|----------------------|------------------|------------------|------------------|----------------------|--------------|-----------------|--------------|-------------------|
| ----- Camilla -----  |                  |                  |                  |                      |              |                 |              |                   |
| Nutrient stress (NS) | <b>&lt;0.001</b> | <b>&lt;0.001</b> | <b>&lt;0.001</b> | <b>0.002</b>         | <b>0.010</b> | <b>0.014</b>    | 0.068        | 0.694             |
| Condition (C)        | 0.472            | <b>0.004</b>     | 0.141            | 0.697                | 0.700        | <b>0.007</b>    | 0.215        | <b>0.015</b>      |
| NS x C               | <b>0.001</b>     | 0.401            | <b>0.001</b>     | <b>0.003</b>         | 0.198        | <b>0.034</b>    | <b>0.004</b> | <b>0.030</b>      |
| ----- Midville ----- |                  |                  |                  |                      |              |                 |              |                   |
| Nutrient stress (NS) | <b>&lt;0.001</b> | 0.858            | <b>&lt;0.001</b> | 0.164                | 0.056        | 0.083           | 0.058        | 0.360             |
| Condition (C)        | 0.358            | 0.229            | 0.322            | 0.430                | 0.677        | 0.523           | 0.401        | 0.541             |
| NS x C               | 0.380            | 0.055            | 0.052            | 0.212                | <b>0.040</b> | <b>0.048</b>    | 0.102        | 0.220             |

<sup>†</sup> Bold texts highlight significant effect terms ( $P < 0.05$ ).

Table S3: *P*-values of the main effects and interaction effects of nutrient stress and growth stage on biomass accumulation of cotton in Camilla and Midville under different production conditions.

| Source               | ----- Camilla ----- |                  |                    | ----- Midville ----- |                   |                    |
|----------------------|---------------------|------------------|--------------------|----------------------|-------------------|--------------------|
|                      | SSDI<br>(2020)      | SSDI<br>(2021)   | Overhead<br>(2021) | Rainfed<br>(2020)    | Rainfed<br>(2021) | Overhead<br>(2021) |
| Nutrient stress (NS) | 0.796               | 0.002            | 0.038              | 0.855                | 0.31              | 0.064              |
| Growth stage (GS)    | <b>&lt;0.001</b>    | <b>&lt;0.001</b> | <b>&lt;0.001</b>   | <b>&lt;0.001</b>     | <b>&lt;0.001</b>  | <b>&lt;0.001</b>   |
| NS x GS              | 0.646               | 0.014            | 0.097              | 0.965                | 0.048             | 0.042              |

<sup>†</sup> Bold texts highlight significant effect terms ( $P < 0.05$ ). SSDI: Sub-surface drip irrigation.

Table S4: *P*-values of the main effects and interaction effects of nutrient stress and production conditions on the fiber quality of cotton in Camilla and Midville.

| Source               | Fiber<br>length              | Fiber<br>strength | Uniformity   | Micronaire   | Rd    | +b           |
|----------------------|------------------------------|-------------------|--------------|--------------|-------|--------------|
| ----- Camilla -----  |                              |                   |              |              |       |              |
| Nutrient stress (NS) | <b>&lt;0.001<sup>†</sup></b> | <b>0.032</b>      | <b>0.006</b> | <b>0.001</b> | 0.244 | <b>0.033</b> |
| Condition (C)        | <b>0.001</b>                 | <b>&lt;0.001</b>  | 0.059        | <b>0.005</b> | 0.748 | 0.819        |
| NS x C               | <b>0.024</b>                 | 0.640             | 0.062        | 0.101        | 0.980 | 0.340        |
| ----- Midville ----- |                              |                   |              |              |       |              |
| Nutrient stress (NS) | 0.513                        | 0.879             | 0.320        | 0.298        | 0.445 | 0.411        |
| Condition (C)        | 0.334                        | 0.323             | 1.000        | 0.404        | 0.524 | <b>0.008</b> |
| NS x C               | <b>0.038</b>                 | 0.200             | 0.135        | 0.054        | 0.397 | <b>0.003</b> |

<sup>†</sup> Bold texts highlight significant effect terms ( $P < 0.05$ ).
